- the prevention and management of prescription drug misuse: A medical education collaboration in Massachusetts. *Acad Med* 2016; 91:1348–51
21. Ashburn MA, Levine RL: Pennsylvania state core competencies for education on opioids and addiction. *Pain Med* 2017; 18:1890–4
  22. Centers of Excellence in Pain Education (CoEPEs). Available at: [https://www.painconsortium.nih.gov/Funding\\_Research/CoEPEs](https://www.painconsortium.nih.gov/Funding_Research/CoEPEs). Accessed June 12, 2019.
  23. Sandbrink F, Uppal R: The time for opioid stewardship is now. *Jt Comm J Qual Patient Saf* 2019; 45:1–2
  24. Gellad WF, Good CB, Shulkin DJ: Addressing the opioid epidemic in the United States: Lessons from the Department of Veterans Affairs. *JAMA Intern Med* 2017; 177:611–2
  25. Adams J, Bledsoe GH, Armstrong JH: Are pain management questions in patient satisfaction surveys driving the opioid epidemic? *Am J Public Health* 2016; 106:985–6

## ANESTHESIOLOGY REFLECTIONS FROM THE WOOD LIBRARY-MUSEUM

### Byline Backstory No. 5: Physic(k)al Pursuits at Ursinus with Mauchly's Skateboard, Snyder's Unicycle...and Einstein's Bike?

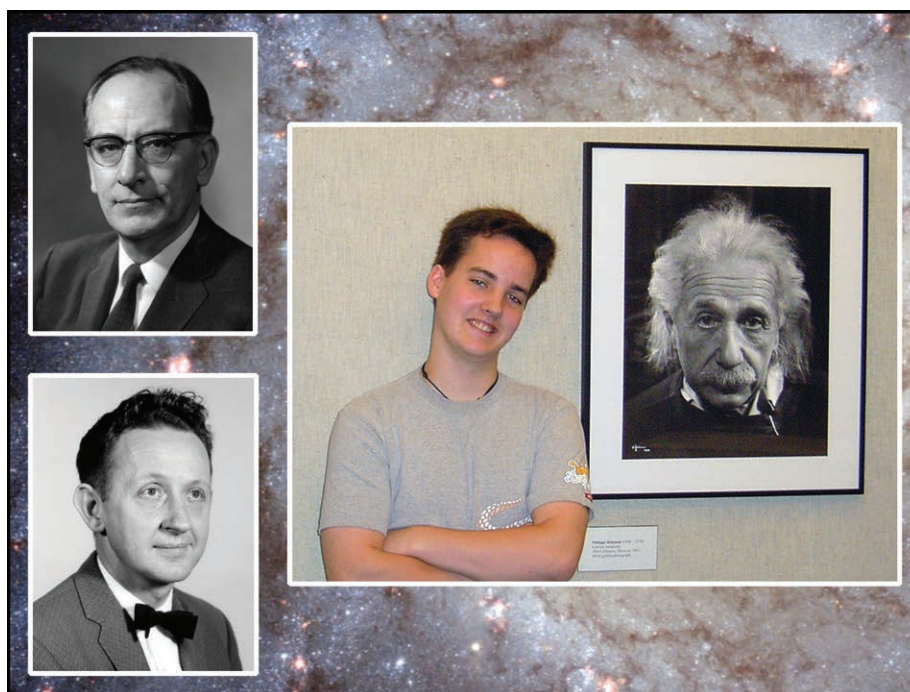

At Pennsylvania's Ursinus College, Professor John W. Mauchly, Ph.D. (1907 to 1980, *upper left*), often taught physics classes from his jet-propelled skateboard. While tinkering with computing components, he had hoped to record and analyze mountains of meteorologic data to, someday, forecast the weather. (After moving to the University of Pennsylvania, Mauchly would invent the ENIAC, the first general purpose computer.) One of Mauchly's successors as chair of physics at Ursinus was Manhattan Project scientist Evan S. Snyder, Ph.D. (1923 to 2009, *lower left*). Rather than a skateboard, Dr. Snyder rode a unicycle to teach his physics students, including premedical students such as myself. From physics at Ursinus, I graduated to studying "physick" or medicine at Johns Hopkins. Fast forward to 2005, when I set aside Wood Library-Museum exhibit designing to return briefly to Ursinus with Evan Bause (*right*). We cocurated Ursinus' "Images & Energies," an art gallery salute to a third free-wheeling physicist: bike-riding Albert Einstein. (Copyright © the American Society of Anesthesiologists' Wood Library-Museum of Anesthesiology.)

*George S. Bause, M.D., M.P.H., Clinical Associate Professor, Case Western Reserve University, Cleveland, Ohio.*
